# Supplementary material for: p53 Proteoforms and Intrinsic Disorder: An Illustration of the Protein Structure–Function Continuum Concept
Source: PubMed Central journal article supplement (PMC5133874; doi:10.3390/ijms17111874), 2016-11-10
Supplement: ijms-17-01874-s001.pdf [file ijms-17-01874-s001.pdf]

## Supplementary Materials: p53 Proteoforms and Intrinsic Disorder: An Illustration of the Protein Structure-Function Continuum Concept

Vladimir N. Uversky

Table S1. 141 X-ray and NMR structures of various human p53 fragments.

| Entry  | Method | Resolution (Å) | Chain   | Positions        | Partners                                                                                                                                     |
|--------|--------|----------------|---------|------------------|----------------------------------------------------------------------------------------------------------------------------------------------|
| 2K8F * | NMR    | -              | B       | 1–39             | p300 TAZ2 domain (1723–1812; Q09472)                                                                                                         |
| 5HOU   | NMR    | -              | A       | 1–61             | Fusion with TAZ1 domain of CBP                                                                                                               |
| 5HPD   | NMR    | -              | A       | 2–61             | Fusion with TAZ2 domain of CBP                                                                                                               |
| 1YCQ   | X-ray  | 2.30           | B       | 13–29            | Mdm2 from <i>Xenopus laevis</i> (12–118; P56273)                                                                                             |
| 2L14   | NMR    | -              | B       | 13–61            | CBP nuclear coactivator binding domain (2061–2117, P45481)                                                                                   |
| 2LY4   | NMR    | -              | B       | 1–93<br>(14–60)  | HMGB1 (1–83; P09429). Note: structure is available for the 14–60 fragment of p53 only                                                        |
| 1YCR   | X-ray  | 2.60           | B       | 15–29            | Mdm2 from <i>Homo sapiens</i> (17–125; Q00987)                                                                                               |
| 2MWY   | NMR    | -              | B       | 15–29            | Mdm4 from <i>Homo sapiens</i> (23–111; O15151)                                                                                               |
| 2Z5S   | X-ray  | 2.30           | P/Q/R   | 15–29            | Mdm4 from <i>Danio rerio</i> (14–139; Q7ZUW7)                                                                                                |
| 2Z5T   | X-ray  | 2.30           | P/Q/R   | 15–29            | Mdm4 from <i>Danio rerio</i> (14–139; Q7ZUW7)                                                                                                |
| 3DAB   | X-ray  | 1.90           | B/D/F/H | 15–29            | Mdm4 from <i>Homo sapiens</i> (23–111; O15151)                                                                                               |
| 4HFZ   | X-ray  | 2.69           | B/D     | 15–29            | Mdm2 from <i>Homo sapiens</i> (17–125; Q00987)                                                                                               |
| 3DAC   | X-ray  | 1.80           | B/P     | 17–37            | Mdm4 from <i>Danio rerio</i> (15–129; Q7ZUW7)                                                                                                |
| 2GS0   | NMR    | -              | B       | 20–73<br>(45–58) | RNA polymerase II transcription factor B subunit 1 (residues 1–115; P32776). Note: structure is available for the 45–58 fragment of p53 only |
| 2B3G   | X-ray  | 1.60           | B       | 33–60            | Replication protein A 70 kDa DNA-binding subunit (residues 1–120; P04637)                                                                    |
| 2MZD   | NMR    | -              | B       | 35–59            | p300 TAZ2 domain (1723–1812; Q09472)                                                                                                         |
| 5HP0   | NMR    | -              | A       | 37–61            | Fusion with TAZ1 domain of CBP                                                                                                               |
| 2RUK   | NMR    | -              | A       | 41–62            | TFIIH p62 PH domain (1–108; P32780)                                                                                                          |
| 2XWR   | X-ray  | 1.68           | A/B     | 89–293           | Self; p53 DNA binding domain (89–293; P04637)                                                                                                |
| 4HJE   | X-ray  | 1.91           | A/B/C/D | 92–291           | DNA                                                                                                                                          |
| 3KMD   | X-ray  | 2.15           | A/B/C/D | 92–291           | DNA                                                                                                                                          |

Table S1. Cont.

| Entry | Method | Resolution (Å) | Chain                       | Positions | Partners                                                                                                                 |
|-------|--------|----------------|-----------------------------|-----------|--------------------------------------------------------------------------------------------------------------------------|
| 2H1L  | X-ray  | 3.16           | M/N/O/P/Q/R/S/<br>T/U/V/W/X | 92–292    | Helicase Domain of Large T antigen from Macaca mulatta polyomavirus 1 (260–627; P03070)                                  |
| 4QO1  | X-ray  | 1.92           | B                           | 92–312    | Nb139 nanobody against the DNA-binding domain of p53                                                                     |
| 1YCS  | X-ray  | 2.20           | A                           | 94–292    | SH3 domain of 53BP2 (327–519; Q13625)                                                                                    |
| 4MZI  | X-ray  | 1.25           | A                           | 94–292    | Alone; Mutation: S121F, V122G, C135V, C141V, W146Y, C182S, V203A, R209P, C229Y, H233Y, Y234F, N235K, Y236F, T253V, N268D |
| 2PCX  | X-ray  | 1.54           | A                           | 94–292    | Alone; R282Q mutant                                                                                                      |
| 4XR8  | X-ray  | 2.25           | C/D                         | 94–292    | Maltose-binding periplasmic protein, ubiquitin ligase E6AP (27–107, P0AEX9) and E6 (8–86, P03126)                        |
| 2AC0  | X-ray  | 1.80           | A/B/C/D                     | 94–293    | DNA                                                                                                                      |
| 2ADY  | X-ray  | 2.50           | A/B                         | 94–293    | DNA                                                                                                                      |
| 2AHI  | X-ray  | 1.85           | A/B/C/D                     | 94–293    | DNA                                                                                                                      |
| 2ATA  | X-ray  | 2.20           | A/B/C/D                     | 94–293    | DNA                                                                                                                      |
| 2YBG  | X-ray  | 1.90           | A/B/C/D                     | 94–293    | p53 with acetylated Lysine 120                                                                                           |
| 3D05  | X-ray  | 1.70           | A                           | 94–293    | Alone; R249S mutant                                                                                                      |
| 3D06  | X-ray  | 1.20           | A                           | 94–293    | Alone; R249S mutant                                                                                                      |
| 3D07  | X-ray  | 2.20           | A/B                         | 94–293    | Alone; R249S mutant                                                                                                      |
| 3D08  | X-ray  | 1.40           | A                           | 94–293    | Alone; R249S/H168R mutant                                                                                                |
| 3D09  | X-ray  | 1.90           | A                           | 94–293    | Alone; R249S/H168R/T123A mutant                                                                                          |
| 3D0A  | X-ray  | 1.80           | A/B/C/D                     | 94–293    | DNA; R249S/H168R mutant                                                                                                  |
| 3IGK  | X-ray  | 1.70           | A                           | 94–293    | DNA; R249S/H168R mutant                                                                                                  |
| 3IGL  | X-ray  | 1.80           | A                           | 94–293    | DNA; wild type (wt)                                                                                                      |
| 3KZ8  | X-ray  | 1.91           | A/B                         | 94–293    | DNA                                                                                                                      |
| 4IBQ  | X-ray  | 1.80           | A/B/C/D                     | 94–293    | Alone; R273C mutant                                                                                                      |
| 4IBS  | X-ray  | 1.78           | A/B/C/D                     | 94–293    | Alone; R273H mutant                                                                                                      |
| 4IBY  | X-ray  | 1.45           | A/B                         | 94–293    | Alone; R273H/S240R mutant                                                                                                |
| 4IBT  | X-ray  | 1.70           | A/B/C/D                     | 94–293    | Alone; R273H/T284R mutant                                                                                                |
| 4IBZ  | X-ray  | 1.92           | A/B/C/D                     | 94–293    | Alone; R273C/T284R mutant                                                                                                |
| 4IBU  | X-ray  | 1.70           | A/B/C/D                     | 94–293    | DNA; R273C/T284R mutant                                                                                                  |
| 4IBV  | X-ray  | 2.10           | A                           | 94–293    | DNA; R273C/S240R mutant                                                                                                  |

Table S1. Cont.

| Entry       | Method     | Resolution (Å) | Chain    | Positions     | Partners                                                 |
|-------------|------------|----------------|----------|---------------|----------------------------------------------------------|
| 4IBW        | X-ray      | 1.79           | A        | 94–293        | DNA; R273H/T284R mutant                                  |
| 2J1Y        | X-ray      | 1.69           | A/B/C/D  | 94–293        | Alone; M133L/V203A/N239Y/G245S/N268D mutant              |
| 4IJT        | X-ray      | 1.78           | A        | 94–293        | Alone; R273H mutant                                      |
| <b>2FEJ</b> | <b>NMR</b> | -              | <b>A</b> | <b>94–297</b> | <b>Alone</b>                                             |
| 4KVP        | X-ray      | 1.50           | A/B/C/D  | 94–312        | Alone; V157F mutant                                      |
| 4LO9        | X-ray      | 2.50           | A/B/C/D  | 94–312        | Alone; N235K mutant                                      |
| 4LOE        | X-ray      | 1.85           | A/B/C/D  | 94–312        | Alone; N239Y mutant                                      |
| 4LOF        | X-ray      | 2.00           | A        | 94–312        | Alone; V157F/N235K/N239Y mutant                          |
| 1TSR        | X-ray      | 2.20           | A/B/C    | 94–312        | DNA; wt                                                  |
| 1TUP        | X-ray      | 2.20           | A/B/C    | 94–312        | DNA; wt                                                  |
| 1UOL        | X-ray      | 1.90           | A/B      | 94–312        | Alone; M133L/V203A/N239Y/N268D mutant                    |
| 2BIM        | X-ray      | 1.98           | A/B      | 94–312        | Alone; M133L/V203A/N239Y/N268D/R273H mutant              |
| 2BIN        | X-ray      | 1.90           | A        | 94–312        | Alone; M133L/H168R/V203A/N239Y/N268D mutant              |
| 2BIO        | X-ray      | 1.90           | A        | 94–312        | Alone; M133L/V203A/N239Y/R249S/N268D mutant              |
| 2BIP        | X-ray      | 1.80           | A        | 94–312        | Alone; M133L/H168R/V203A/N239Y/R249S/N268D mutant        |
| 2BIQ        | X-ray      | 1.80           | A        | 94–312        | Alone; T123A/M133L/H168R/V203A/N239Y/R249S/N268D mutant  |
| 2J1W        | X-ray      | 1.80           | A/B      | 94–312        | Alone; M133L/V143A/V203A/N239Y/N268D mutant              |
| 2J1X        | X-ray      | 1.65           | A/B      | 94–312        | Alone; M133L/V203A/Y220C/N239Y/N268D mutant              |
| 2J1Z        | X-ray      | 1.80           | A/B      | 94–312        | Alone; M133L/V203A/N239Y/N268D/F270L mutant              |
| 2J20        | X-ray      | 1.80           | A/B      | 94–312        | Alone; M133L/V203A/N239Y/N268D/R273C mutant              |
| 2J21        | X-ray      | 1.60           | A/B      | 94–312        | Alone; M133L/V203A/N239Y/N268D/R282W mutant              |
| 2WGX        | X-ray      | 1.75           | A/B      | 94–312        | Alone; M133L/V203A/Y236F/N239Y/T253I/N268D mutant        |
| 2OCJ        | X-ray      | 2.05           | A/B/C/D  | 94–312        | Alone; wt                                                |
| 2VUK        | X-ray      | 1.50           | A/B      | 94–312        | Stabilizing small molecule PhiKan083; Y220C mutant       |
| 2X0U        | X-ray      | 1.60           | A/B      | 94–312        | 2-amino substituted benzothiazole scaffold; Y220C mutant |
| 2X0V        | X-ray      | 1.80           | A/B      | 94–312        | 4-(trifluoromethyl)benzene-1,2-diamine; Y220C mutant     |
| 2X0W        | X-ray      | 2.10           | A/B      | 94–312        | 5,6-dimethoxy-2-methylbenzothiazole; Y220C mutant        |
| 3ZME        | X-ray      | 1.35           | A/B      | 94–312        | Stabilizing small molecule PhiKan7242; Y220C mutant      |
| 4AGL        | X-ray      | 1.70           | A/B      | 94–312        | Stabilizing small molecule PhiKan784; Y220C mutant       |

Table S1. Cont.

| Entry | Method | Resolution (Å) | Chain   | Positions | Partners                                                                                                                                                                                                                                                                                                                                                          |
|-------|--------|----------------|---------|-----------|-------------------------------------------------------------------------------------------------------------------------------------------------------------------------------------------------------------------------------------------------------------------------------------------------------------------------------------------------------------------|
| 4AGM  | X-ray  | 1.52           | A/B     | 94–312    | Stabilizing small molecule PhiKan5086; Y220C mutant                                                                                                                                                                                                                                                                                                               |
| 4AGN  | X-ray  | 1.60           | A/B     | 94–312    | Stabilizing small molecule PhiKan5116; Y220C mutant                                                                                                                                                                                                                                                                                                               |
| 4AGO  | X-ray  | 1.45           | A/B     | 94–312    | Stabilizing small molecule PhiKan5174; Y220C mutant                                                                                                                                                                                                                                                                                                               |
| 4AGP  | X-ray  | 1.50           | A/B     | 94–312    | Stabilizing small molecule PhiKan5176; Y220C mutant                                                                                                                                                                                                                                                                                                               |
| 4AGQ  | X-ray  | 1.42           | A/B     | 94–312    | Stabilizing small molecule PhiKan5196; Y220C mutant                                                                                                                                                                                                                                                                                                               |
| 5A7B  | X-ray  | 1.40           | A/B     | 94–312    | Stabilizing small molecule PhiKan5211; Y220C mutant                                                                                                                                                                                                                                                                                                               |
| 5ABA  | X-ray  | 1.62           | A/B     | 94–312    | Stabilizing small molecule PhiKan5149; Y220C mutant                                                                                                                                                                                                                                                                                                               |
| 5AOK  | X-ray  | 1.35           | A/B     | 94–312    | Stabilizing small molecule PhiKan7099; Y220C mutant                                                                                                                                                                                                                                                                                                               |
| 5AOM  | X-ray  | 1.74           | A/B     | 94–312    | Stabilizing small molecule PhiKan883; Y220C mutant                                                                                                                                                                                                                                                                                                                |
| 5G4M  | X-ray  | 1.38           | A/B     | 94–312    | Monofluorinated derivative of Phikan083; Y220C mutant                                                                                                                                                                                                                                                                                                             |
| 5G4N  | X-ray  | 1.35           | A/B     | 94–312    | Difluorinated derivative of Phikan083; Y220C mutant                                                                                                                                                                                                                                                                                                               |
| 5G4O  | X-ray  | 1.48           | A/B     | 94–312    | Trifluorinated derivative of Phikan083; Y220C mutant                                                                                                                                                                                                                                                                                                              |
| 5AB9  | X-ray  | 1.36           | A/B     | 94–312    | 7-ethyl-3-(piperidin-4-yl)-1H-indole; Y220C mutant                                                                                                                                                                                                                                                                                                                |
| 5AOI  | X-ray  | 1.78           | A/B     | 94–312    | Indole-based small molecule; Y220C mutant                                                                                                                                                                                                                                                                                                                         |
| 5AOJ  | X-ray  | 1.47           | A/B     | 94–312    | 2-hydroxy-3,5-diiodo-4-(1H-pyrrol-1-yl)benzoic acid; Y220C mutant                                                                                                                                                                                                                                                                                                 |
| 5AOL  | X-ray  | 1.50           | A/B     | 94–312    | 3-bromo-5-(trifluoromethyl)benzene-1,2-diamine; Y220C mutant                                                                                                                                                                                                                                                                                                      |
| 3Q01  | X-ray  | 2.10           | A/B     | 94–356    | Homodimer; C135V, C141V, W146Y, C182S, V203A, R209P, C229Y, H233Y, Y234F, N235K, Y236F, T253V, N268D, P322T, L323M, M340Q, L344R mutant                                                                                                                                                                                                                           |
| 3Q05  | X-ray  | 2.40           | A/B/C/D | 94–356    | DNA; C135V, C141V, W146Y, C182S, V203A, R209P, C229Y, H233Y, Y234F, N235K, Y236F, T253V, N268D, P322T, L323M, M340Q, L344R, G356T mutant                                                                                                                                                                                                                          |
| 3TS8  | X-ray  | 2.80           | A/B/C/D | 94–356    | Natural CDKN1A(p21) p53-response element (DNA); C135V, C141V, W146Y, C182S, V203A, R209P, C229Y, H233Y, Y234F, N235K, Y236F, T253V, N268D, P322T, L323M, M340Q, L344R, G356T mutant                                                                                                                                                                               |
| 4MZR  | X-ray  | 2.90           | A/B/C/D | 94–388    | DNA; S121F, V122G, C135V, C141V, W146Y, C182S, V203A, R209P, C229Y, H233Y, Y234F, N235K, Y236F, T253V, N268D, ΔK292, ΔG293, ΔE294, ΔP295, ΔH296, ΔH297, ΔE298, ΔL299, ΔP300, ΔP301, ΔG302, ΔS303, ΔT304, ΔK305, ΔR306, ΔA307, ΔL308, ΔP309, ΔN310, ΔN311, ΔS313, ΔS314, ΔS315, ΔP316, ΔQ317, ΔP318, ΔK319, ΔK320, P322T, L323M, M340Q, L344R, G356T, K357E mutant |

Table S1. Cont.

| Entry       | Method       | Resolution (Å) | Chain          | Positions      | Partners                                                                                    |
|-------------|--------------|----------------|----------------|----------------|---------------------------------------------------------------------------------------------|
| 1KZY        | X-ray        | 2.50           | A/B            | 95–289         | p53-binding protein 1 (1714–1972; Q12888)                                                   |
| 1GZH        | X-ray        | 2.60           | A/C            | 95–292         | p53-binding protein 1 (1724–1972; Q12888)                                                   |
| 5ECG        | X-ray        | 3.00           | A/B            | 95–312         | p53-binding protein 1 (1724–1972; Q12888) and SpQEY peptide of the histone H2A variant H2AX |
| 2MEJ        | NMR          | -              | B              | 96–312         | Bcl-2-like protein 1 (1–209, Q07817)                                                        |
| 3Q06        | X-ray        | 3.20           | A/B/C/D        | 96–354         | DNA                                                                                         |
| <b>2YDR</b> | <b>X-ray</b> | <b>2.75</b>    | <b>P</b>       | <b>144–154</b> | <b>O-GlcNAcase NAGJ (31–618, Q0TR53)</b>                                                    |
| <b>4RP6</b> | <b>X-ray</b> | <b>1.70</b>    | <b>Z</b>       | <b>252–258</b> | <b>Amyloid-like fibril</b>                                                                  |
| 4RP7        | X-ray        | 1.58           | Z              | 253–258        | Amyloid-like fibril                                                                         |
| 1OLG        | NMR          | -              | A/B/C/D        | 319–360        | Homotetramer                                                                                |
| <b>1OLH</b> | <b>NMR</b>   | <b>-</b>       | <b>A/B/C/D</b> | <b>319–360</b> | <b>Homotetramer</b>                                                                         |
| 1SAE        | NMR          | -              | A/B/C/D        | 319–360        | Homotetramer                                                                                |
| 1SAF        | NMR          | -              | A/B/C/D        | 319–360        | Homotetramer                                                                                |
| 1SAK        | NMR          | -              | A/B/C/D        | 319–360        | Homotetramer                                                                                |
| 1SAL        | NMR          | -              | A/B/C/D        | 319–360        | Homotetramer                                                                                |
| 3SAK        | NMR          | -              | A/B/C/D        | 319–360        | Homotetramer                                                                                |
| 1HS5        | NMR          | -              | A/B            | 324–357        | Designed homodimer, Met340Gln/Leu344Arg mutant                                              |
| 1A1U        | NMR          | -              | A/C            | 324–358        | Designed homodimer, Met340Lys/Phe341Ile/Leu344Tyr mutant                                    |
| 1PET        | NMR          | -              | A/B/C/D        | 325–355        | Homotetramer                                                                                |
| 1PES        | NMR          | -              | A/B/C/D        | 325–355        | Homotetramer                                                                                |
| 1C26        | X-ray        | 1.70           | A              | 325–356        | Homotetramer                                                                                |
| 2J0Z        | NMR          | -              | A/B/C/D        | 326–356        | Homotetramer, T329F/Q331K mutant                                                            |
| 2J10        | NMR          | -              | A/B/C/D        | 326–356        | Homotetramer, T329F/Q331K mutant                                                            |
| 2J11        | NMR          | -              | A/B/C/D        | 326–356        | Homotetramer, Y327S/T329G/Q331G mutant                                                      |
| 1AIE        | X-ray        | 1.50           | A              | 326–356        | Homotetramer                                                                                |
| <b>2FOO</b> | <b>X-ray</b> | <b>2.20</b>    | <b>B</b>       | <b>358–363</b> | <b>N-terminal domain of HAUSP/USP7 (51–205; Q93009)</b>                                     |
| 2F1X        | X-ray        | 2.30           | A/B            | 359–368        | N-terminal domain of HAUSP/USP7 (49–209; Q93009)                                            |
| 2FOJ        | X-ray        | 1.60           | B              | 361–367        | N-terminal domain of HAUSP/USP7 (51–209; Q93009)                                            |

Table S1. Cont.

| Entry | Method | Resolution (Å) | Chain | Positions | Partners                                                                                                                                                               |
|-------|--------|----------------|-------|-----------|------------------------------------------------------------------------------------------------------------------------------------------------------------------------|
| 2MWO  | NMR    | -              | B     | 363–377   | <b>Tumor suppressor p53-binding protein 1 (Tudor-like region residues 1484–1603, Q12888)</b>                                                                           |
| 3TG5  | X-ray  | 2.30           | B     | 365–375   | <i>N</i> -lysine methyltransferase SMYD2 (Q9NRG4) and SAH ( <i>S</i> -adenosyl-L-homocysteine)                                                                         |
| 1JSP  | NMR    | -              | A     | 367–386   | CBP Bromodomain (1081–1197, Q92793)                                                                                                                                    |
| 1DT7  | NMR    | -              | X/Y   | 367–388   | Calcium-bound S100ββ (P04631)                                                                                                                                          |
| 1XQH  | X-ray  | 1.75           | B/F   | 369–377   | <b>Methyltransferase SET9 (107–366, Q8WTS6) and SAH</b>                                                                                                                |
| 1MA3  | X-ray  | 2.00           | B     | 372–389   | Transcriptional regulatory protein Sir2 from <i>Archaeoglobus fulgidus</i> (O30124)                                                                                    |
| 1YC5  | X-ray  | 1.40           | B     | 372–389   | <b>NAD-dependent deacetylase Sir2 from <i>Thermotoga maritima</i> (Q9WYW0)</b>                                                                                         |
| 2H2D  | X-ray  | 1.70           | B     | 372–389   | NAD-dependent deacetylase Sir2 from <i>Thermotoga maritima</i> (Q9WYW0)                                                                                                |
| 2H2F  | X-ray  | 2.20           | B     | 372–389   | NAD-dependent deacetylase Sir2 from <i>Homo sapiens</i> (P04637)                                                                                                       |
| 2H4F  | X-ray  | 2.00           | D     | 372–389   | NAD-dependent deacetylase Sir2 from <i>Thermotoga maritima</i> (Q9WYW0)                                                                                                |
| 2H4H  | X-ray  | 1.99           | B     | 372–389   | NAD-dependent deacetylase Sir2 from <i>Thermotoga maritima</i> (Q9WYW0), H116Y mutant                                                                                  |
| 2H4J  | X-ray  | 2.10           | D     | 372–389   | NAD-dependent deacetylase Sir2 from <i>Thermotoga maritima</i> (Q9WYW0)                                                                                                |
| 2H59  | X-ray  | 1.90           | D/E   | 372–389   | NAD-dependent deacetylase Sir2 from <i>Thermotoga maritima</i> (Q9WYW0), H116A mutant                                                                                  |
| 3PDH  | X-ray  | 1.80           | D     | 372–389   | NAD-dependent deacetylase Sir2 from <i>Thermotoga maritima</i> (Q9WYW0)                                                                                                |
| 1H26  | X-ray  | 2.24           | E     | 376–386   | Cell division protein kinase 2 (CDK2, P24941) and Cyclin A2 (173–432, P20248)                                                                                          |
| 2MWP  | NMR    | -              | B     | 376–387   | <b>Tumor suppressor p53-binding protein 1 (Tudor-like region residues 1484–1603, Q12888)</b>                                                                           |
| 4BV2  | X-ray  | 3.30           | E/H   | 376–388   | <b>NAD-dependent deacetylase Sir2 from <i>Thermotoga maritima</i> (Q9WYW0)</b>                                                                                         |
| 3OQ5  | X-ray  | 2.50           | D/E   | 377–386   | 3-MBT domain from human Lethal(3)malignant brain tumor-like protein, L3MBTL1 (191–530, Q9Y468). Note: entire sequence of the p53 fragment is missing in this structure |
| 4X34  | X-ray  | 1.80           | C/D   | 377–386   | <b>Tumor suppressor p53-binding protein 1 (Tudor-like region residues 1484–1603, Q12888)</b>                                                                           |
| 4ZZJ  | X-ray  | 2.74           | B     | 379–383   | <b>NAD-dependent protein deacetylase sirtuin-1 (183–503, Q96EB6)</b>                                                                                                   |
| 4BUZ  | X-ray  | 1.90           | P     | 379–386   | NAD-dependent deacetylase Sir2 from <i>Thermotoga maritima</i> (Q9WYW0)                                                                                                |
| 3LW1  | X-ray  | 1.28           | P     | 385–393   | <b>14-3-3 protein sigma (P31947)</b>                                                                                                                                   |

\* Entries indicated by the bold font represent structures discussed in the text.
